# Supplementary material for: Arrest of Viral Proliferation by Ectopic Copies of Its Cognate Replication Origin
Source: MDPI journal article supplement (doi:10.3390/genes6020436), 2015-06-23
Supplement: s1 [file s1]

## Supplementary Materials

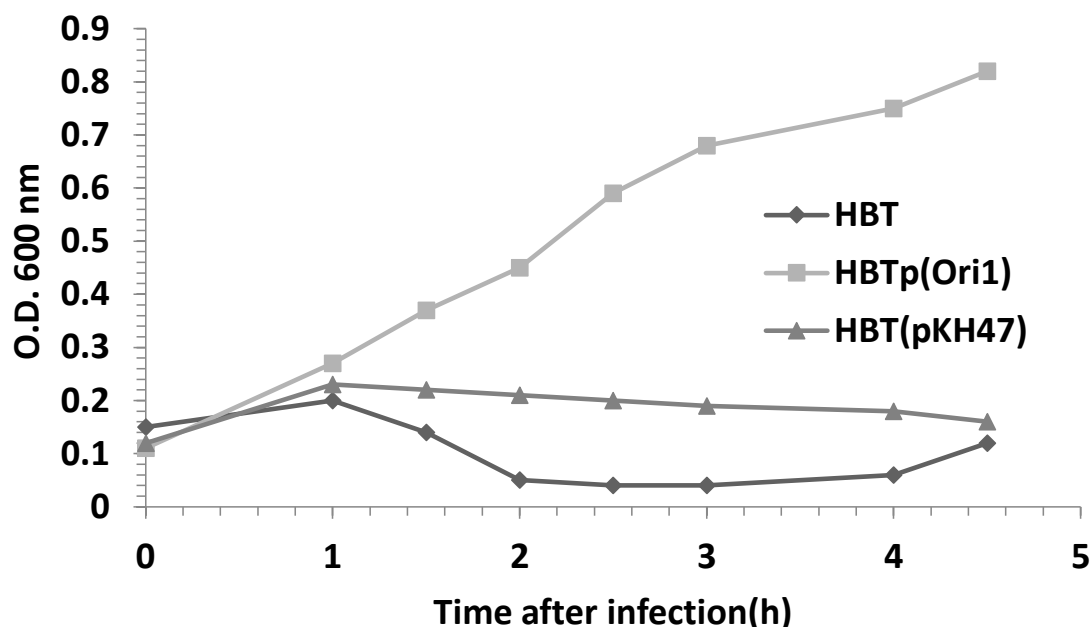

**Figure S1.** Growth of  $\lambda$ -infected HBT containing a plasmid lacking the  $\lambda$ Ori region. HBT containing pKH47, a closely related plasmid to pOri1, but lacking the  $\lambda$ Ori region, was infected with  $\lambda$  phage, and its growth profile monitored and compared to a  $\lambda$ -infected HBT(pOri1), and to an uninfected HBT.

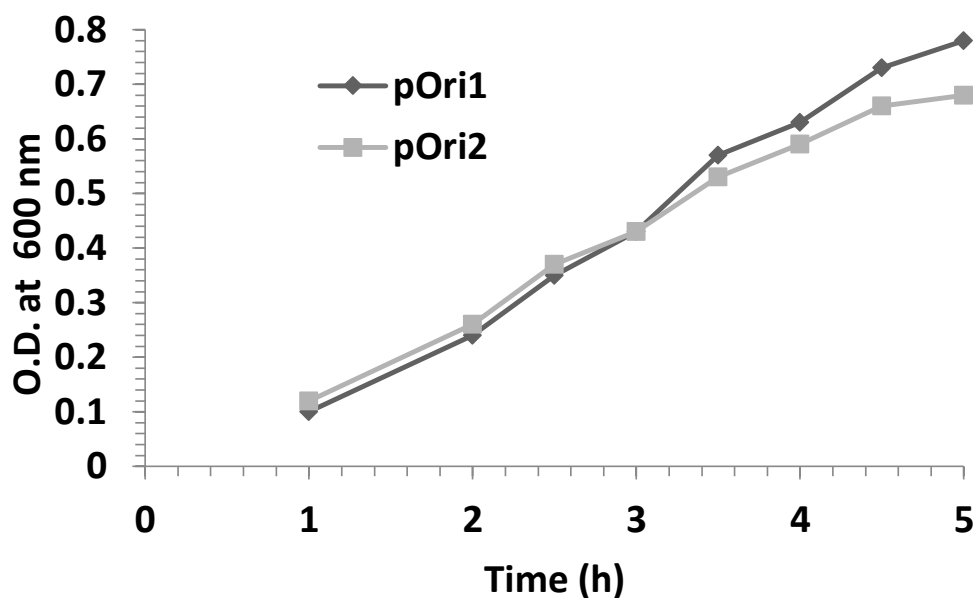

**Figure S2.** Effect of harboring two copies of the  $\lambda$  Ori region per plasmid on the growth profile of HBT after  $\lambda$  infection. HBT(pOri2) a strain containing, a variant of plasmid pOri1, harboring two tandem copies of the  $\lambda$ Ori region was infected with  $\lambda$ , and its growth profile monitored and compared to a  $\lambda$ -infected HBT(pOri1), and to an uninfected HBT.
